# Supplementary material
Source: PubMed Central journal article supplement (PMC7771572)
Supplement: NIHMS1657099-supplement-Supporting_Methods__Table_S1_legend__Figures_S1_and_S2.pdf [file NIHMS1657099-supplement-Supporting_Methods__Table_S1_legend__Figures_S1_and_S2.pdf]

## Supporting Information

# NHS-Esters as Versatile Reactivity-Based Probes for Mapping Proteome-Wide Ligandable Hotspots

Carl C. Ward<sup>1</sup>, Jordan I. Kleinman<sup>1</sup>, and Daniel K. Nomura<sup>\*1</sup>

<sup>1</sup> Departments of Chemistry, Molecular and Cell Biology, and Nutritional Sciences and Toxicology, 127 Morgan Hall, University of California, Berkeley, Berkeley, CA 94720

\*correspondence to [dnomura@berkeley.edu](mailto:dnomura@berkeley.edu)

## Supporting Methods

### Synthesis of CW 1-26 and CW 1-33

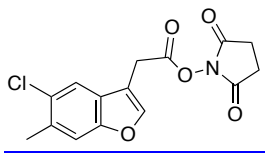

### Synthesis of 2,5-dioxopyrrolidin-1-yl 2-(5-chloro-6-methylbenzofuran-3-yl)acetate,

**CW 1-26:** 35.6 mg (160  $\mu$ mol) of (5-chloro-6-methyl-1-benzofuran-3-yl)acetic acid (Sigma) were dissolved in anhydrous DCM. 1.3 equivalents of NHS (23.9 mg, 208  $\mu$ mol, Sigma) and EDC-HCl (39.7 mg, 208  $\mu$ mol, Acros) were added and the mixture was stirred overnight under nitrogen. TLC (70% EtOAc/Hex) showed > 90% conversion. The crude mixture was filtered, concentrated and applied directly to a silica gel column and purified with a mobile phase of 50% EtOAc/Hex, which yielded 28.7 mg of product (56% yield).

**$^1\text{H NMR}$  (600MHz,  $\text{CDCl}_3$ ):**  $\delta$  7.66 (s, 1H), 7.58 (s, 1H), 7.35 (s, 1H), 3.97 (s, 1H), 2.00 (s, 2H), 2.84 (s, 4H), 2.46 (s, 3H).

**$^{13}\text{C NMR}$  (125MHz,  $\text{CDCl}_3$ ):**  $\delta$  168.8, 165.7, 153.9, 143.9, 132.8, 129.3, 126.1, 119.4, 113.3, 110.4, 26.6, 25.6, 20.8

**HRMS (-ESI):** Calculated: 320.0331 ( $\text{C}_{15}\text{H}_{11}\text{ClNO}_5$ ). Observed: 320.0326

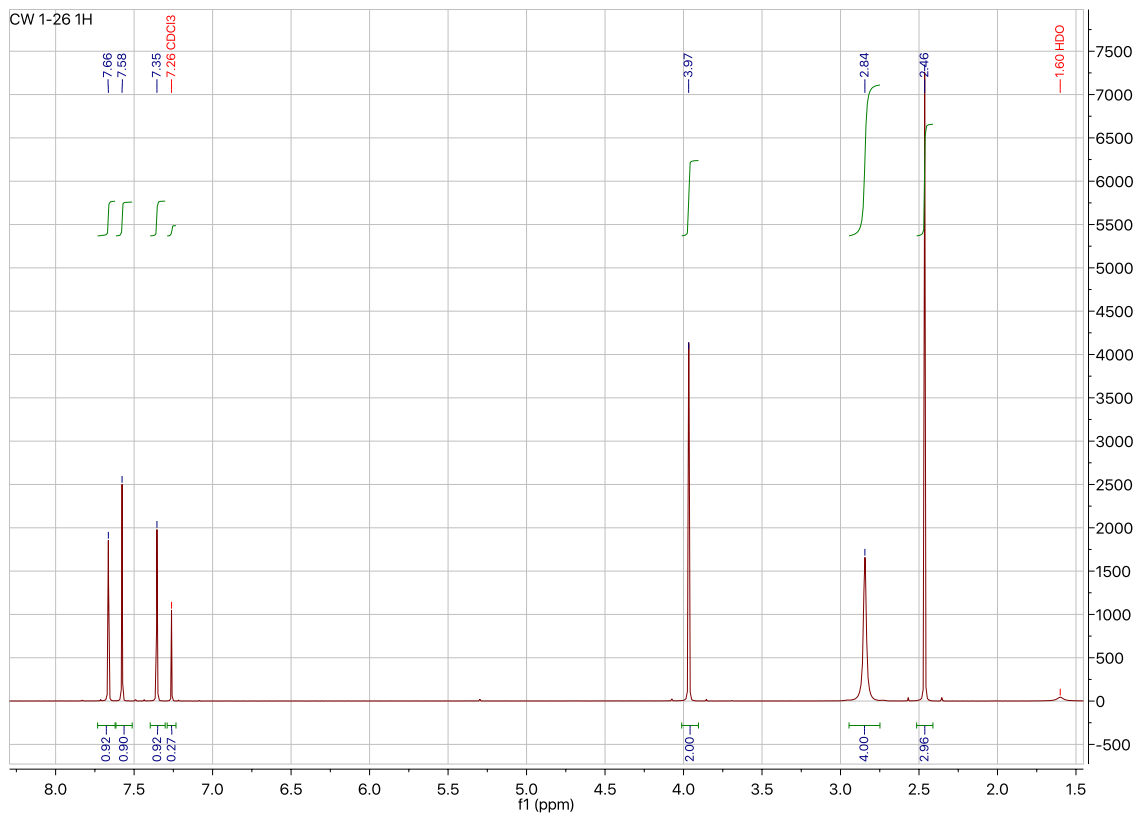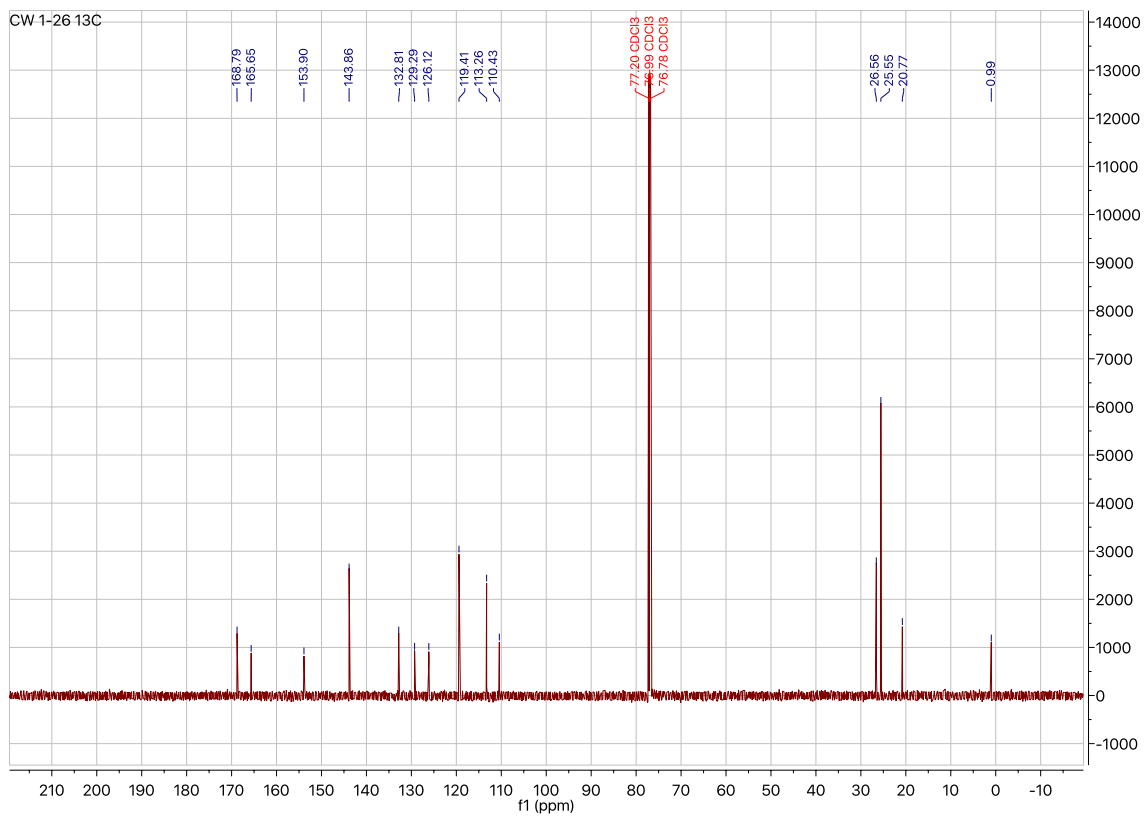

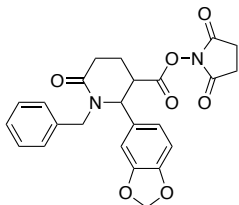

**Synthesis of 2,5-dioxopyrrolidin-1-yl 2-(benzo[d][1,3]dioxol-5-yl)-1-benzyl-6-oxopiperidine-3-carboxylate, CW 1-33:** 51.5 mg of 2-(1,3-Benzodioxol-5-yl)-1-benzyl-6-oxo-3-piperidinecarboxylic acid (146  $\mu\text{mol}$ , Matrix scientific) were dissolved in 7.5 mL of anhydrous DCM. 1.4 equivalents of NHS (23.5 mg, 204  $\mu\text{M}$ , Sigma) and EDC-HCl (39.1 mg, 204  $\mu\text{M}$ , Acros) were added and the mixture stirred overnight under nitrogen. TLC (EtOAc) of the reaction showed > 90% conversion after 14 hours. The mixture was filtered, concentrated and applied directly to a silica gel column and purified with a mobile phase of EtOAc. 31.0 mg were recovered (47%).

**$^1\text{H}$  NMR (600MHz,  $\text{CDCl}_3$ ):**  $\delta$  7.27-7.23 (m, 3H), 7.13 (d,  $J$  = 6.9 Hz, 2H), 6.81 (d,  $J$  = 7.8 Hz, 1H), 6.67-6.21 (m, 2H), 6.00 (s, 2H), 5.51 (d,  $J$  = 14.9 Hz, 1H), 4.75 (d,  $J$  = 4.4 Hz, 1H), 3.49 (d,  $J$  = 14.8 Hz, 1H), 3.10 (dt,  $J$  = 6.4, 4.2 Hz, 1H), 2.84-2.78 (m, 5H), 2.67 (dt,  $J$  = 18.4, 5.7 Hz, 1H), 2.28-2.14 (m, 2H)

**$^{13}\text{C}$  NMR (125MHz,  $\text{CDCl}_3$ ):**  $\delta$  169.3, 168.7, 167.7, 148.7, 147.9, 136.3, 132.7, 128.8, 128.5, 127.5, 120.7, 108.8, 107.1, 101.6, 60.2, 47.9, 45.1, 29.8, 25.7, 20.7

**HRMS (+ESI):** Calculated: 451.1500 ( $\text{C}_{24}\text{H}_{23}\text{O}_7\text{N}_2$ ). Observed: 451.1500

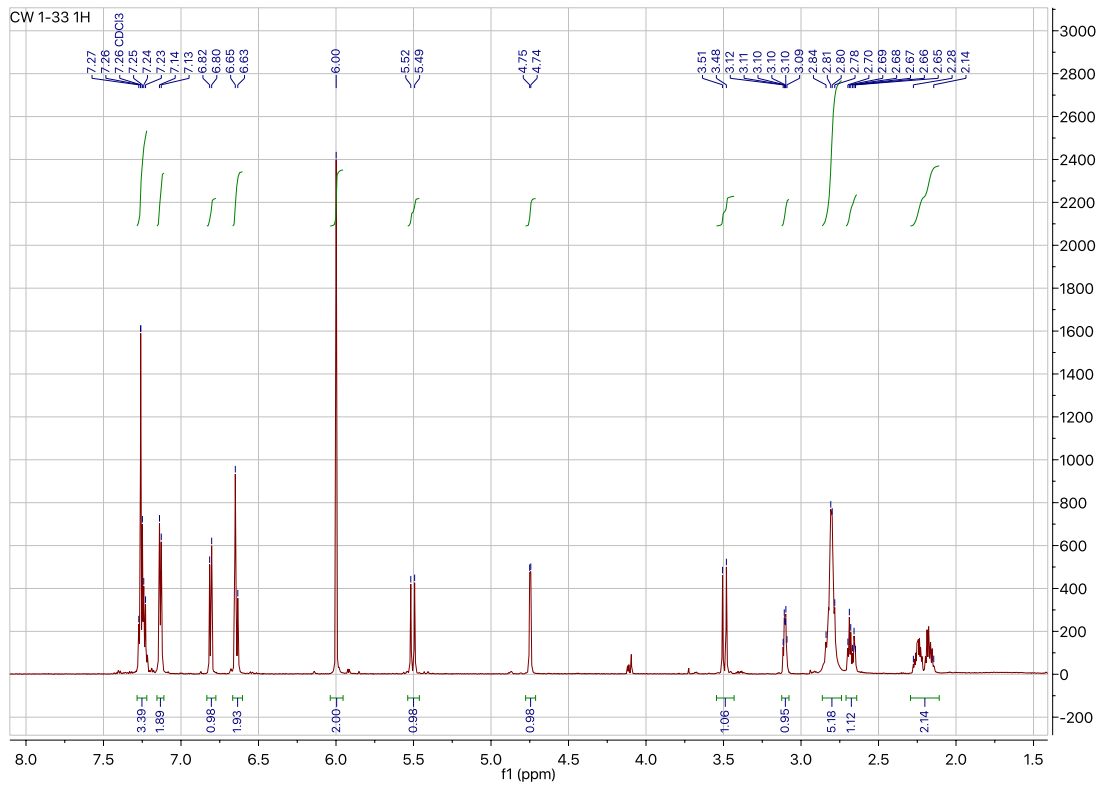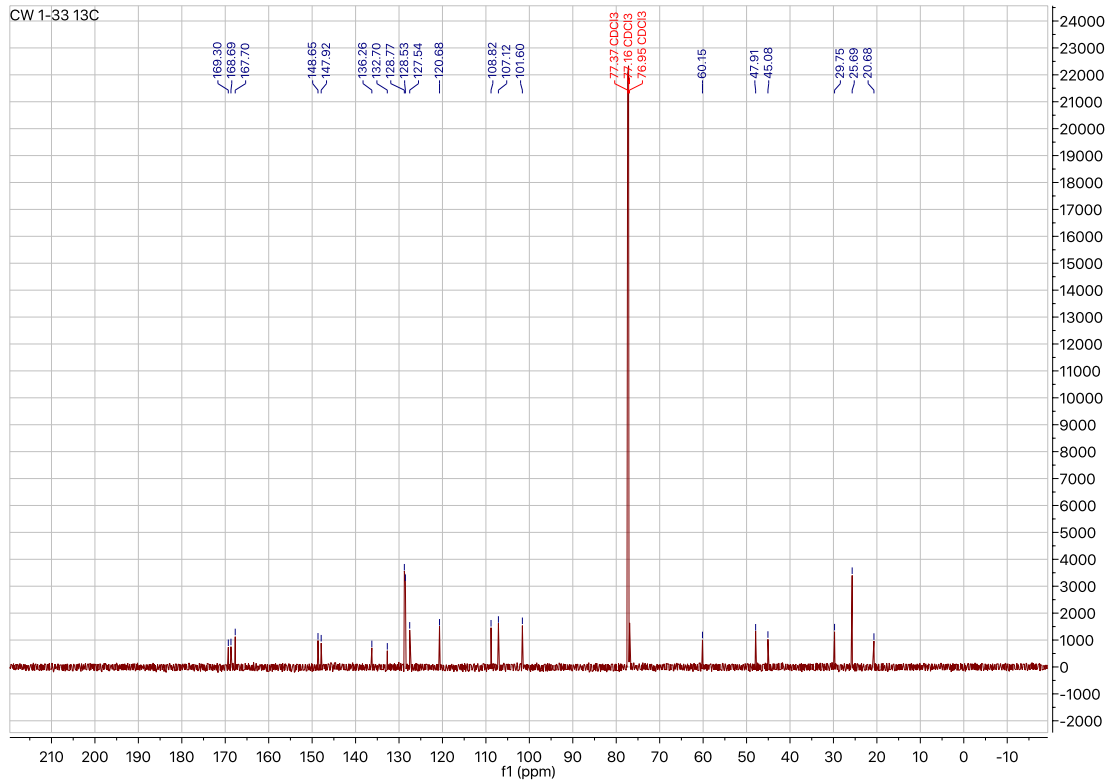

## Table Legends

### Table S1. IsoTOP-ABPP proteomic data

**Tabs 1-9.** Amino acid reactivity of NHS-ester-alkyne in mouse liver proteome. Mouse liver proteomes were labeled with NHS-ester-alkyne (500 or 100  $\mu\text{M}$ ), followed by appendage of biotin-azide tags bearing an isotopically light (for 500  $\mu\text{M}$ ) or heavy (for 100  $\mu\text{M}$ ) tags and a TEV recognition sequence, followed by mixing heavy or light proteomes in 1:1 ratio, avidin-enrichment of probe-labeled proteins, digestion of enriched proteins by trypsin, and isolation of release of probe-modified tryptic peptides by TEV protease for subsequent LC-LC/MS/MS analysis. Reported in **Tabs 1, 3, 5, 7, and 9** are probe-modified peptides separated by amino acid reactivity, the specific amino acids labeled, the light to heavy isotopic ratios, Uniprot identification numbers, and protein designations. Only peptides that were present in 2 out of 4 biological replicates are reported here. Ratios shown are average ratios from the biological replicates. Reported in **Tabs 2, 4, 6, 8, and 10** are known annotations from probe-modified peptides based on the Uniprot database.

**Tab 10.** Lysine-reactivity of the Dichlorotriazine-alkyne probe in mouse liver proteomes. Mouse liver proteomes were labeled with dichlorotriazine-alkyne (500 or 100  $\mu\text{M}$ ), followed by appendage of biotin-azide tags bearing an isotopically light (for 500  $\mu\text{M}$ ) or heavy (for 100  $\mu\text{M}$ ) tags and a TEV recognition sequence, followed by mixing heavy or light proteomes in 1:1 ratio, avidin-enrichment of probe-labeled proteins, digestion of enriched proteins by trypsin, and isolation of release of probe-modified tryptic peptides by TEV protease for subsequent LC-LC/MS/MS analysis. Only peptides that were present in 2 out of 3 biological replicates are reported here. Ratios shown are average ratios from the biological replicates.

**Tabs 11 and 12.** IsoTOP-ABPP analysis of CW 1-26 and CW 1-33 in mouse liver proteomes. DMSO vehicle or CW 1-26 (100  $\mu$ M) or CW 1-33 (100  $\mu$ M) were pre-treated in mouse liver proteomes for 30 min prior to labeling of proteomes with NHS-ester-alkyne (500  $\mu$ M) for 1 h at room temperature, followed by appendage of light (for vehicle-treated control) or heavy (for fragment-treated) biotin-TEV-azide tags, followed by the isoTOP-ABPP procedure. Shown are the probe-modified peptides identified, the isotopic light to heavy ratios, sites of probe-modification, uniprot IDs, and protein designations. Only peptides that were present in 2 out of 3 biological replicates are reported here. Ratios shown are average ratios from the biological replicates.

**Figure S1**

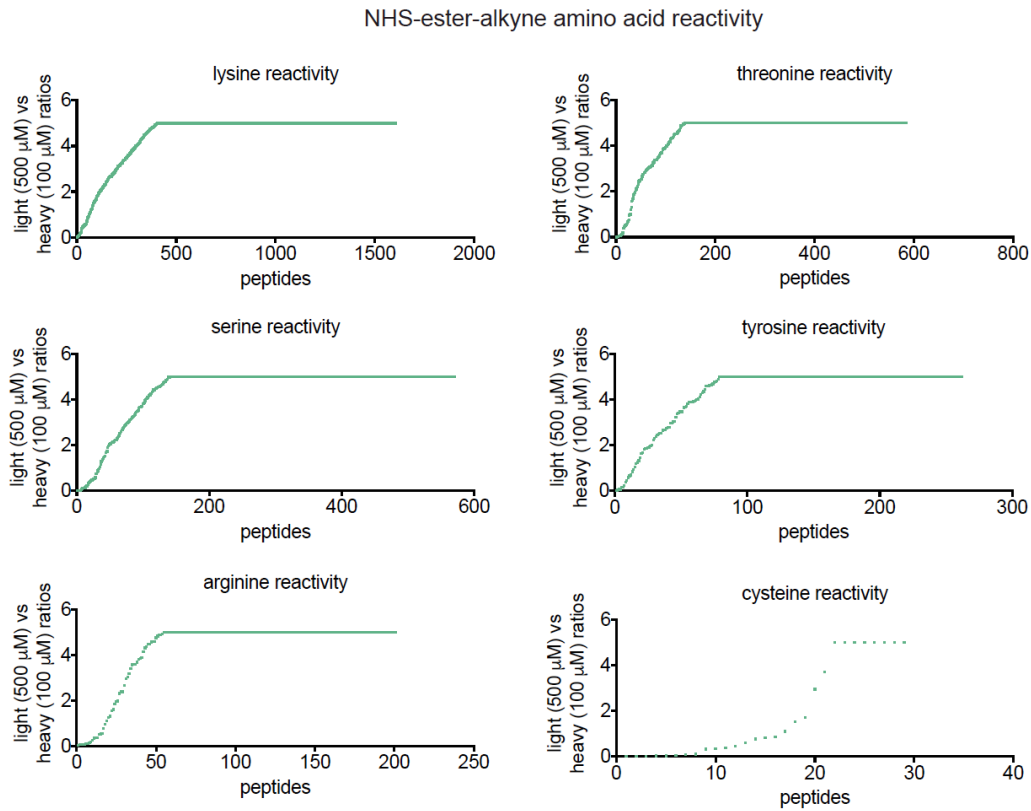

**Figure S1. NHS-ester-alkyne amino acid reactivity.** We labeled mouse liver proteomes with 500 versus 100  $\mu\text{M}$  NHS-ester-alkyne probe, followed by CuAAC-mediated conjugation of an isotopically light (for 500  $\mu\text{M}$ ) or heavy (for 100  $\mu\text{M}$ ) biotin-azide handles bearing a TEV protease recognition sequence, followed by isoTOP-ABPP analysis of isolated probe-modified tryptic peptides. Shown are the ratios for the individual peptides identified categorized by amino acid reactivity. A light to heavy isotopic ratio of 5 indicates a site that is not hyper-reactive, versus an isotopic ratio of  $<2$  which can be considered hyper-reactive. Data shown are average ratios for probe-modified peptides that were found in at least two out of three biological replicates. Those ratios that were  $>5$  are just shown as having a ratio of 5. Raw data for these plots can be found in **Table S1**.



**Figure S2.**

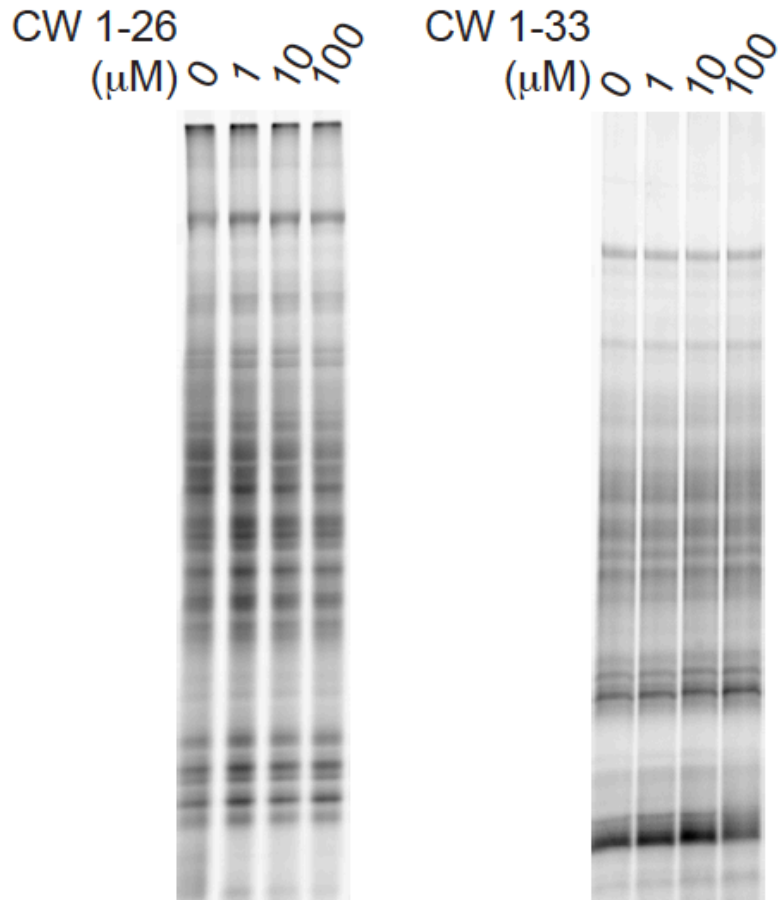

**Figure S2. CW 1-26 and CW 1-33 competition against NHS-ester-alkyne reactivity in mouse liver proteomes.** DMSO vehicle or CW 1-26 or CW 1-33 were pre-incubated for 30 min with mouse liver proteomes prior to labeling with NHS-ester-alkyne (100 μM) for 30 min. Rhodamine-azide was then appended to probe-labeled proteins and proteins were separated by SDS/PAGE and NHS-ester-alkyne reactivity was assessed by in-gel fluorescence. Shown is a representative grey-scale gel.
